# Supplementary material for: Signatures of accelerated somatic evolution in gene promoters in multiple cancer types
Source: PubMed Central journal article supplement — Nucleic Acids Res. 2015 May 1;43(11):5307–17. doi: 10.1093/nar/gkv419 (PMC4477653; doi:10.1093/nar/gkv419), 2015-05-01
Supplement: supp_gkv419_Supplementary.pdf [file supp_gkv419_Supplementary.pdf]

**Supplementary Information  
for  
Signatures of accelerated somatic evolution  
in gene promoters in multiple cancer types**

Kyle S. Smith et al.

# Supplementary Figure 1

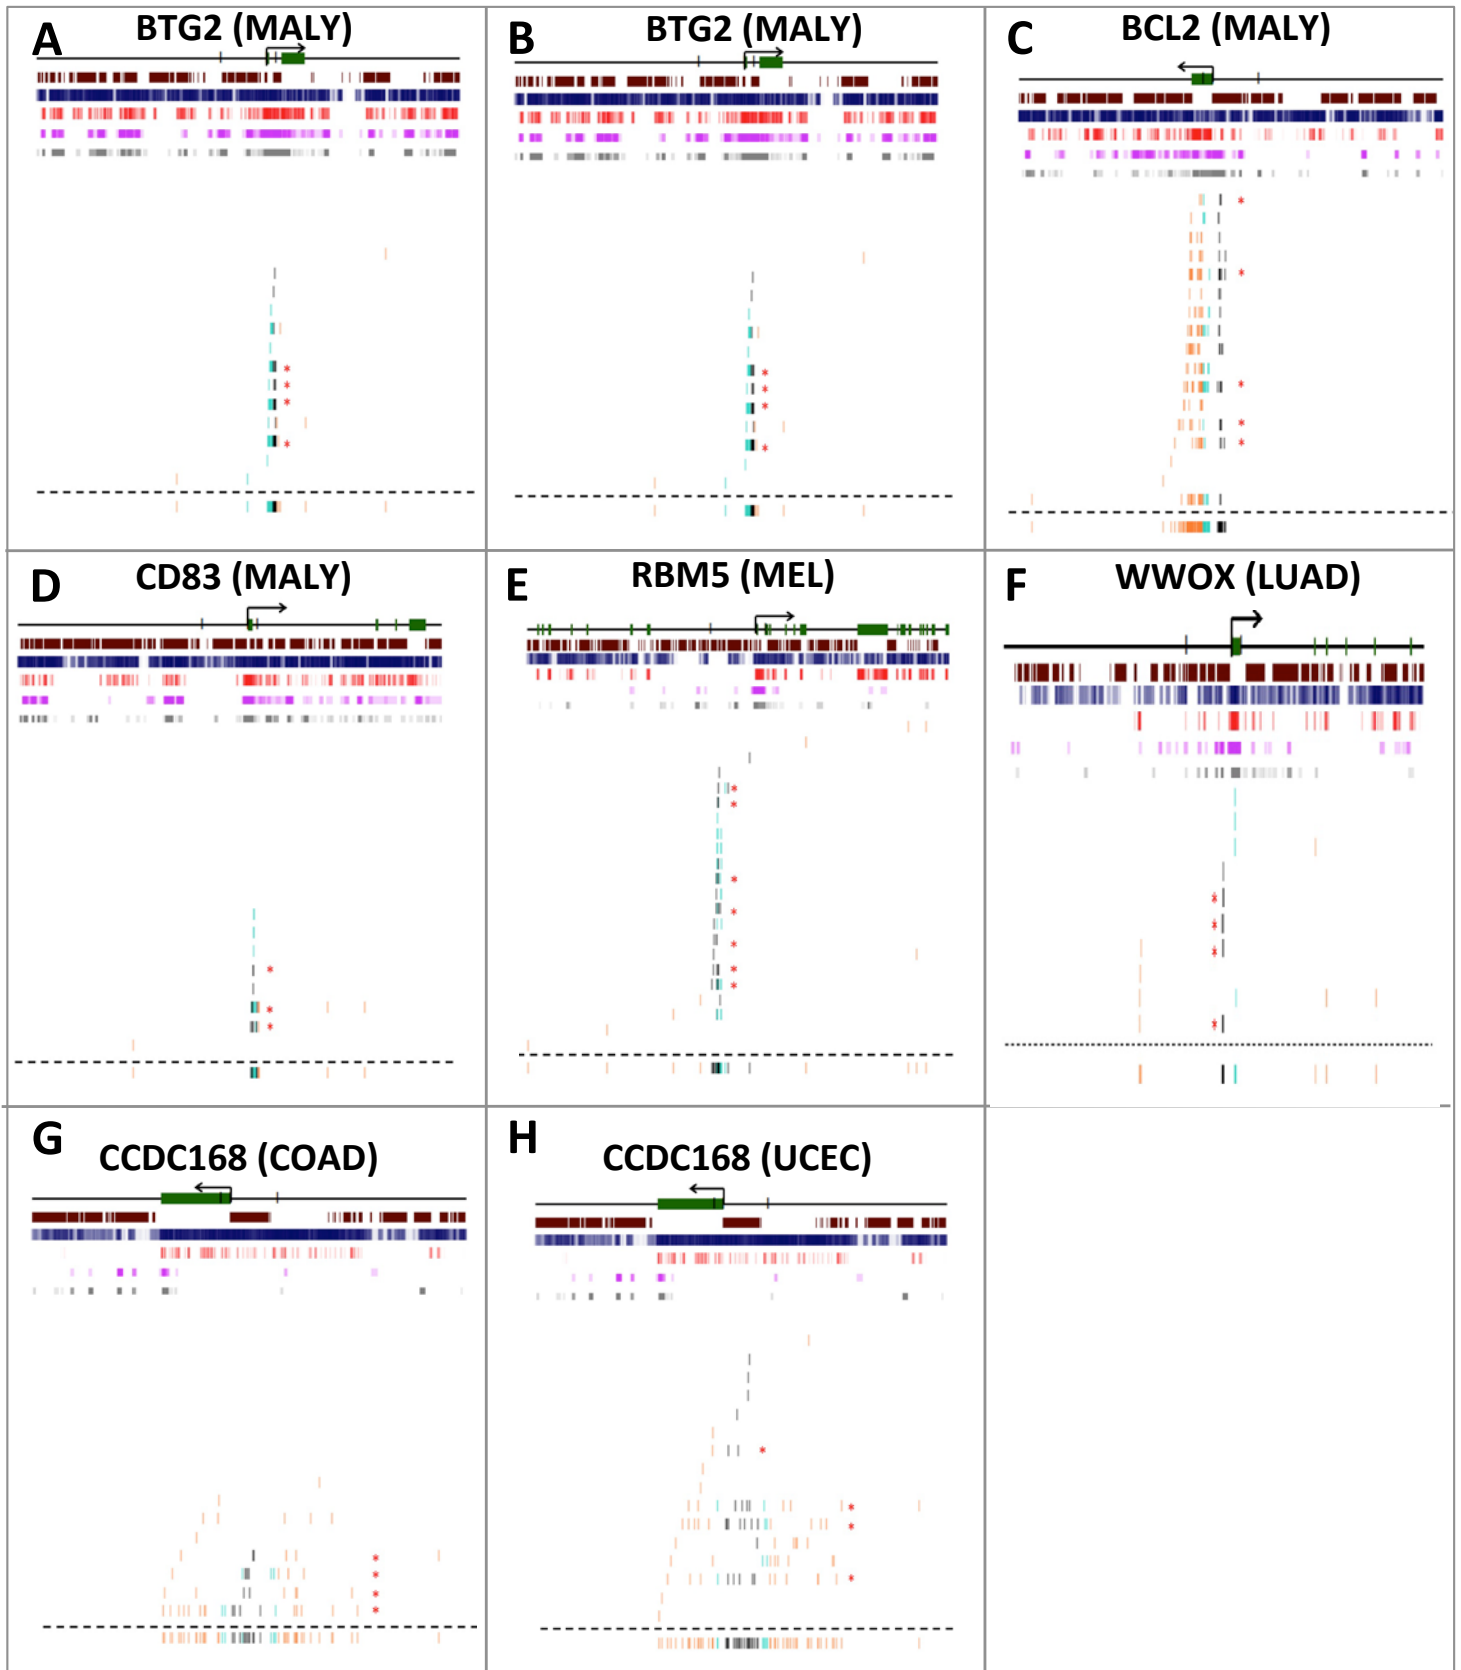

**Supplementary Figure 1: Signatures of accelerated somatic evolution in gene promoters in (A-D) malignant lymphoma, (E) melanoma, (F) lung adenocarcinoma, (G) UCEC and (H) COAD cohorts.** Those cases that are found in multiple cancer types, show associated gene expression changes, or clinical attributes are listed. Mutations in Tier-II+III regions of predicted promoters (5kb upstream to 1kb downstream of transcription start site) are shown in grey, those in Tier-I+IV regions of predicted promoters are shown in cyan, as in Figure 1. Additional evolutionary and functional annotations are also shown, as in Figure 1. Significant promoters are shown with asterisk.

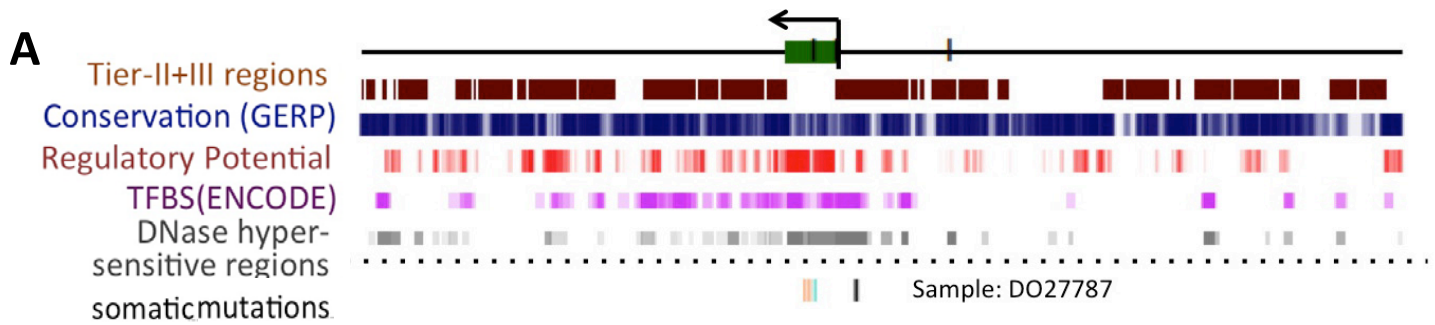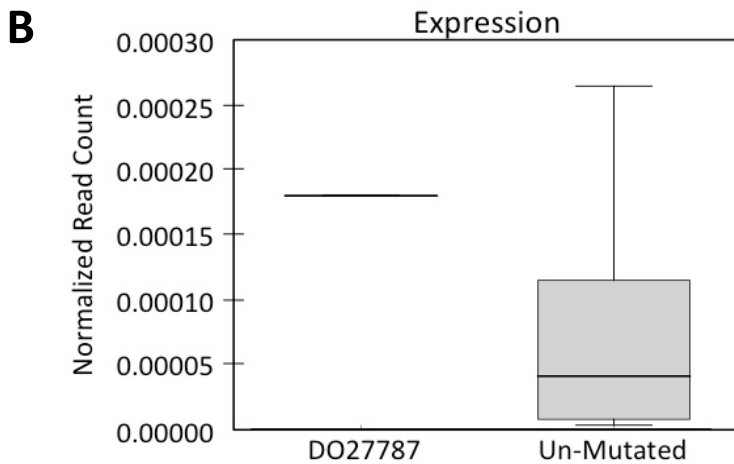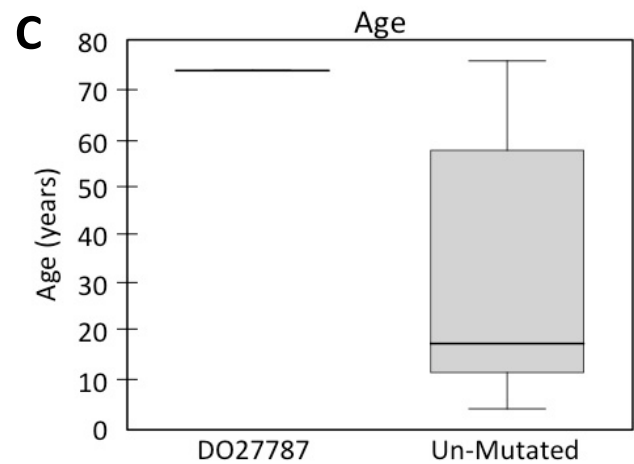

**Supplementary Figure 2: Individual case study. A)** We showcase a lymphoma sample DO27787 that shows signature of accelerated evolution in the promoter of BCL2. Sample DO27787 has a significant number of mutations in the promoter compared to the flanking regions. After masking the repetitive and coding regions there are 3 mutations in the promoter and 0 in the flanking regions (fisher's exact test  $p$ -value = 0.0036). The enrichment was maintained even when we considered alternate window sizes, applied filter for evolutionary conservation, or used permutation to assess statistical significance. The mutations in the BCL2 promoter mapped to DNase hypersensitive regions, and overlapped with multiple, predicted binding sites of transcription factor p65 also known as nuclear factor NF-kappa-B p65 subunit (RELA), insulator element CTCF, and several other transcription factors such as ZEB1, EGR1, FOXA1 etc. Sample DO27787 exemplifies **B)** the increased expression and **C)** advanced age shown to be associated with SASE in the BCL2 promoter.

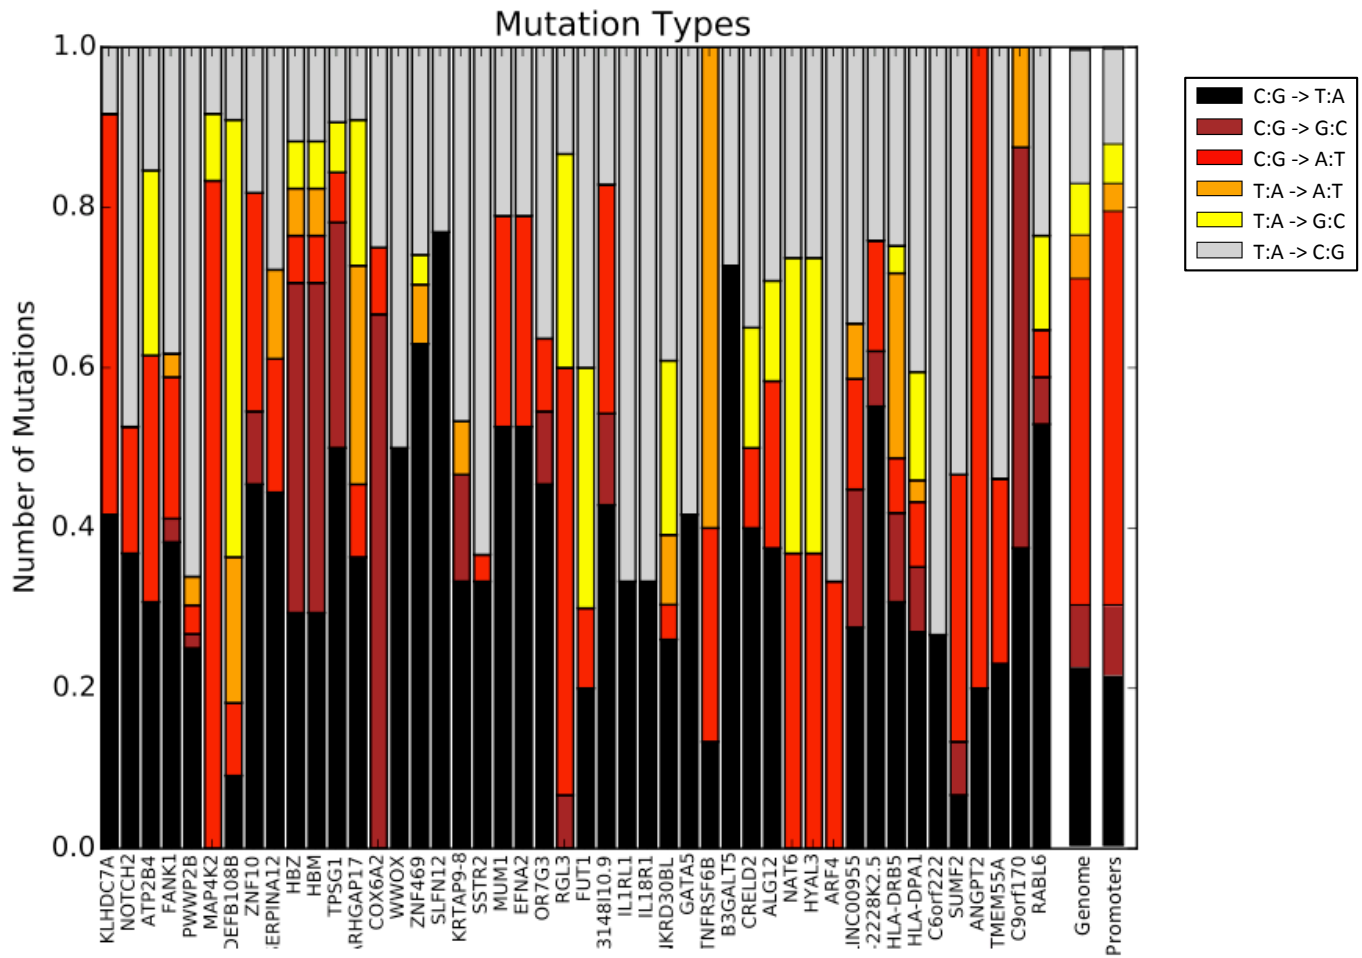

**Supplementary Figure 3:** Nucleotide substitution patterns in the gene promoters that had signatures of accelerated somatic evolution, contrasted against that observed in all gene promoters and also in the completely sequenced genomes for lung adenocarcinoma samples.

**Supplementary Table 1: Table showing FDR adjusted p-values for signatures of accelerated evolution in the promoters of the known protein-coding genes in different cancer cohorts.** We repeated the analyses using alternative parameter-settings, as in Supplementary Table ST1-4, and found consistent results (exceptions: DNMT1, MAP4K2, GATA5).

| Genes         | Position                     | Cancer type         | Cohort (total samples) | # samples with significant SASE | FDR adjusted p value |
|---------------|------------------------------|---------------------|------------------------|---------------------------------|----------------------|
| IGLL5         | chr22:23229960:23238287:+1   | Malignant Lymphoma  | MALY-DE (44)           | 8                               | 4.25E-11             |
| BTG2          | chr1:203274619:203278730:+1  | Malignant Lymphoma  | MALY-DE (44)           | 4                               | 9.29E-10             |
| BCL6          | chr3:187439165:187463515:-1  | Malignant Lymphoma  | MALY-DE (44)           | 10                              | 9.29E-10             |
| TCL1A         | chr14:96176304:96180533:-1   | Malignant Lymphoma  | MALY-DE (44)           | 4                               | 7.88E-05             |
| MYC           | chr8:128747680:128753674:+1  | Malignant Lymphoma  | MALY-DE (44)           | 3                               | 1.35E-04             |
| BCL2          | chr18:60790579:60987361:-1   | Malignant Lymphoma  | MALY-DE (44)           | 5                               | 2.60E-04             |
| CD83          | chr6:14117872:14137149:+1    | Malignant Lymphoma  | MALY-DE (44)           | 3                               | 1.07E-03             |
| S1PR2         | chr19:10334520:10341948:-1   | Malignant Lymphoma  | MALY-DE (44)           | 4                               | 1.60E-03             |
| BIRC3         | chr11:102188215:102210134:+1 | Malignant Lymphoma  | MALY-DE (44)           | 4                               | 5.30E-03             |
| DNMT1         | chr19:10244021:10341962:-1   | Malignant Lymphoma  | MALY-DE (44)           | 3                               | 1.05E-02             |
| RBM5          | chr3:50126341:50156454:+1    | Melanoma            | Melanoma (25)          | 7                               | 3.07E-07             |
| MEAF6         | chr1:37958176:37980375:-1    | Melanoma            | Melanoma (25)          | 3                               | 1.54E-04             |
| RNF223        | chr1:1006346:1009687:-1      | Melanoma            | Melanoma (25)          | 6                               | 4.09E-04             |
| CCS           | chr11:66360292:66373490:+1   | Melanoma            | Melanoma (25)          | 4                               | 8.45E-03             |
| KLHDC7A       | chr1:18807424:18812478:1     | Lung Adenocarcinoma | LUAD (32)              | 3                               | 1.93E-03             |
| NOTCH2        | chr1:120454176:120612240:-1  | Lung Adenocarcinoma | LUAD (32)              | 5                               | 1.53E-02             |
| ATP2B4        | chr1:203595689:203713209:1   | Lung Adenocarcinoma | LUAD (32)              | 3                               | 6.35E-04             |
| FANK1         | chr10:127585108:127698161:1  | Lung Adenocarcinoma | LUAD (32)              | 8                               | 1.61E-09             |
| PWWP2B        | chr10:134210672:134231367:1  | Lung Adenocarcinoma | LUAD (32)              | 15                              | 2.21E-13             |
| MAP4K2        | chr11:64556290:64570713:-1   | Lung Adenocarcinoma | LUAD (32)              | 3                               | 6.71E-03             |
| DEFB108B      | chr11:71544246:71548756:1    | Lung Adenocarcinoma | LUAD (32)              | 4                               | 4.28E-03             |
| ZNF10         | chr12:133707161:133736051:1  | Lung Adenocarcinoma | LUAD (32)              | 4                               | 9.56E-03             |
| SERPINA12     | chr14:94953611:94984181:-1   | Lung Adenocarcinoma | LUAD (32)              | 5                               | 1.10E-04             |
| HBZ           | chr16:202686:204502:1        | Lung Adenocarcinoma | LUAD (32)              | 5                               | 1.65E-04             |
| HBM           | chr16:203891:216767:1        | Lung Adenocarcinoma | LUAD (32)              | 5                               | 1.10E-04             |
| TPSG1         | chr16:1271651:1275257:-1     | Lung Adenocarcinoma | LUAD (32)              | 4                               | 3.38E-02             |
| ARHGAP17      | chr16:24930706:25026987:-1   | Lung Adenocarcinoma | LUAD (32)              | 3                               | 6.35E-04             |
| COX6A2        | chr16:31439052:31439967:-1   | Lung Adenocarcinoma | LUAD (32)              | 5                               | 1.70E-11             |
| WWOX          | chr16:78133310:79246564:1    | Lung Adenocarcinoma | LUAD (32)              | 4                               | 7.30E-04             |
| ZNF469        | chr16:88493879:88507165:1    | Lung Adenocarcinoma | LUAD (32)              | 7                               | 2.22E-05             |
| SLFN12        | chr17:33738079:33760302:-1   | Lung Adenocarcinoma | LUAD (32)              | 4                               | 1.28E-04             |
| KRTAP9-8      | chr17:39394297:39395256:1    | Lung Adenocarcinoma | LUAD (32)              | 3                               | 2.57E-06             |
| SSTR2         | chr17:71161151:71167185:1    | Lung Adenocarcinoma | LUAD (32)              | 9                               | 1.25E-05             |
| MUM1          | chr19:1285890:1378430:1      | Lung Adenocarcinoma | LUAD (32)              | 3                               | 4.03E-03             |
| EFNA2         | chr19:1286153:1301430:1      | Lung Adenocarcinoma | LUAD (32)              | 3                               | 3.15E-03             |
| OR7G3         | chr19:9236688:9237626:-1     | Lung Adenocarcinoma | LUAD (32)              | 3                               | 5.82E-04             |
| RGL3          | chr19:11495017:11530018:-1   | Lung Adenocarcinoma | LUAD (32)              | 3                               | 7.58E-04             |
| FUT1          | chr19:49251268:49258647:-1   | Lung Adenocarcinoma | LUAD (32)              | 4                               | 3.20E-02             |
| CTD-3148110.9 | chr19:49966009:49989488:1    | Lung Adenocarcinoma | LUAD (32)              | 7                               | 3.03E-03             |
| IL1RL1        | chr2:102927962:102968497:1   | Lung Adenocarcinoma | LUAD (32)              | 3                               | 8.11E-04             |
| IL18R1        | chr2:102927989:103015218:1   | Lung Adenocarcinoma | LUAD (32)              | 3                               | 7.58E-04             |
| ANKRD30BL     | chr2:132905164:133015542:-1  | Lung Adenocarcinoma | LUAD (32)              | 6                               | 7.67E-05             |
| GATA5         | chr20:61038553:61051026:-1   | Lung Adenocarcinoma | LUAD (32)              | 3                               | 6.22E-04             |
| TNFRSF6B      | chr20:62328021:62330037:1    | Lung Adenocarcinoma | LUAD (32)              | 7                               | 4.97E-09             |
| B3GALT5       | chr21:40928369:41045064:1    | Lung Adenocarcinoma | LUAD (32)              | 4                               | 2.09E-02             |
| ALG12         | chr22:50293877:50312106:-1   | Lung Adenocarcinoma | LUAD (32)              | 4                               | 3.14E-05             |
| CRELD2        | chr22:50311815:50321188:1    | Lung Adenocarcinoma | LUAD (32)              | 4                               | 3.80E-02             |
| HYAL3         | chr3:50330262:50336899:-1    | Lung Adenocarcinoma | LUAD (32)              | 3                               | 1.32E-02             |
| NAT6          | chr3:50333833:50336852:-1    | Lung Adenocarcinoma | LUAD (32)              | 3                               | 1.23E-02             |
| ARF4          | chr3:57557090:57583947:-1    | Lung Adenocarcinoma | LUAD (32)              | 3                               | 3.79E-02             |
| LINC00955     | chr4:3578596:3592438:1       | Lung Adenocarcinoma | LUAD (32)              | 9                               | 5.67E-13             |
| CTD-2228K2.5  | chr5:466239:473213:-1        | Lung Adenocarcinoma | LUAD (32)              | 6                               | 9.56E-03             |
| HLA-DRB5      | chr6:32485120:32498064:-1    | Lung Adenocarcinoma | LUAD (32)              | 12                              | 3.39E-12             |
| HLA-DPA1      | chr6:33032346:33048552:-1    | Lung Adenocarcinoma | LUAD (32)              | 5                               | 5.36E-05             |
| C6orf222      | chr6:36283534:36304662:-1    | Lung Adenocarcinoma | LUAD (32)              | 3                               | 3.38E-02             |
| SUMF2         | chr7:56131695:56148363:1     | Lung Adenocarcinoma | LUAD (32)              | 4                               | 2.78E-03             |
| ANGPT2        | chr8:6357172:6420930:-1      | Lung Adenocarcinoma | LUAD (32)              | 4                               | 3.38E-02             |
| TMEM55A       | chr8:92006024:92053292:-1    | Lung Adenocarcinoma | LUAD (32)              | 3                               | 1.58E-02             |
| C9orf170      | chr9:89763559:89774471:1     | Lung Adenocarcinoma | LUAD (32)              | 3                               | 3.63E-03             |
| RABL6         | chr9:139702374:139735639:1   | Lung Adenocarcinoma | LUAD (32)              | 3                               | 6.35E-04             |
| CCDC168       | chr13:103381801:103389159:-1 | Colon cancer        | COAD-US (19)           | 4                               | 1.04E-04             |
| CCDC168       | chr13:103381801:103389159:-1 | Endometrial cancer  | UCEC-US (131)          | 4                               | 1.64E-08             |

**Supplementary Table 2: Table showing FDR adjusted p-values for signatures of accelerated evolution when alternate window sizes for genomic neighborhood were considered.** Our analysis shows that significant cases of SASE were not due to choice of window sizes, and typically became even more significant when larger window sizes for genomic neighborhood were considered. DNMT1, GATA5, and MAP4K2 are an exceptions, where the enrichment could be due to local increase in mutation rate, and may be false positives.

| Genes     | Position                     | Cohort (total samples) | # samples with significant SASE | FDR adjusted p-value |                     |
|-----------|------------------------------|------------------------|---------------------------------|----------------------|---------------------|
|           |                              |                        |                                 | Neighborhood: 40kb   | Neighborhood: 100kb |
| IGLL5     | chr22:23229960:23238287:+1   | MALY-DE (44)           | 8                               | 9.70E-30             | 2.25E-60            |
| BTG2      | chr1:203274619:203278730:+1  | MALY-DE (44)           | 4                               | 1.02E-17             | 5.79E-28            |
| BCL6      | chr3:187439165:187463515:-1  | MALY-DE (44)           | 10                              | 2.82E-18             | 1.24E-31            |
| TCL1A     | chr14:96176304:96180533:-1   | MALY-DE (44)           | 4                               | 1.19E-06             | 7.12E-10            |
| MYC       | chr8:128747680:128753674:+1  | MALY-DE (44)           | 3                               | 4.77E-06             | 1.01E-07            |
| BCL2      | chr18:60790579:60987361:-1   | MALY-DE (44)           | 5                               | 1.41E-09             | 1.45E-18            |
| CD83      | chr6:14117872:14137149:+1    | MALY-DE (44)           | 3                               | 2.24E-05             | 2.31E-08            |
| S1PR2     | chr19:10334520:10341948:-1   | MALY-DE (44)           | 4                               | 1.16E-03             | 9.36E-08            |
| BIRC3     | chr11:102188215:102210134:+1 | MALY-DE (44)           | 4                               | 3.55E-04             | 2.05E-08            |
| DNMT1     | chr19:10244021:10341962:-1   | MALY-DE (44)           | 3                               | <b>3.69E-01</b>      | <b>4.38E-01</b>     |
| RBM5      | chr3:50126341:50156454:+1    | Melanoma (25)          | 7                               | 1.77E-09             | 1.53E-13            |
| MEAF6     | chr1:37958176:37980375:-1    | Melanoma (25)          | 3                               | 4.43E-03             | 1.07E-02            |
| RNF223    | chr1:1006346:1009687:-1      | Melanoma (25)          | 6                               | 3.82E-06             | 3.43E-06            |
| CCS       | chr11:66360292:66373490:+1   | Melanoma (25)          | 4                               | 1.68E-03             | 1.90E-04            |
| KLHDC7A   | chr1:18807424:18812478:-1    | LUAD (32)              | 3                               | 5.80E-05             | 2.21E-06            |
| NOTCH2    | chr1:120454176:120612240:-1  | LUAD (32)              | 5                               | 3.79E-05             | 4.18E-08            |
| ATP2B4    | chr1:203595689:203713209:1   | LUAD (32)              | 3                               | 4.52E-05             | 1.93E-05            |
| FANK1     | chr10:127585108:127698161:-1 | LUAD (32)              | 8                               | 4.44E-13             | 1.88E-20            |
| PWWP2B    | chr10:134210672:134231367:1  | LUAD (32)              | 15                              | 4.71E-24             | 6.28E-32            |
| MAP4K2    | chr11:64556290:64570713:-1   | LUAD (32)              | 15                              | <b>9.42E-03</b>      | <b>8.52E-02</b>     |
| DEFB108B  | chr11:71544246:71548756:1    | LUAD (32)              | 4                               | 4.28E-03             | 2.95E-02            |
| ZNF10     | chr12:133707161:133736051:1  | LUAD (32)              | 4                               | 4.06E-04             | 1.51E-06            |
| SERPINA12 | chr14:94953611:94984181:-1   | LUAD (32)              | 5                               | 4.98E-06             | 3.68E-09            |
| HBZ       | chr16:202686:204502:1        | LUAD (32)              | 5                               | 4.98E-06             | 3.99E-08            |
| HBM       | chr16:203891:216767:1        | LUAD (32)              | 5                               | 3.03E-06             | 2.00E-08            |
| TPSG1     | chr16:1271651:1275257:-1     | LUAD (32)              | 4                               | 4.06E-04             | 1.20E-09            |
| ARHGAP17  | chr16:24930706:25026987:-1   | LUAD (32)              | 3                               | 2.25E-05             | 9.16E-08            |
| COX6A2    | chr16:31439052:31439967:-1   | LUAD (32)              | 5                               | 1.93E-13             | 1.47E-16            |
| WWOX      | chr16:78133310:79246564:1    | LUAD (32)              | 4                               | 5.88E-06             | 5.03E-07            |
| ZNF469    | chr16:88493879:88507165:1    | LUAD (32)              | 7                               | 3.75E-10             | 2.80E-11            |
| SLFN12    | chr17:33738079:33760302:-1   | LUAD (32)              | 4                               | 4.54E-03             | 6.91E-04            |
| KRTAP9-8  | chr17:39394297:39395256:1    | LUAD (32)              | 3                               | 4.29E-09             | 6.01E-09            |
| SSTR2     | chr17:71161151:71167185:1    | LUAD (32)              | 9                               | 5.01E-10             | 3.67E-11            |
| MUM1      | chr19:1285890:1378430:1      | LUAD (32)              | 3                               | 3.98E-04             | 9.35E-05            |
| EFNA2     | chr19:1286153:1301430:1      | LUAD (32)              | 3                               | 2.82E-04             | 6.92E-05            |
| OR7G3     | chr19:9236688:9237626:-1     | LUAD (32)              | 3                               | 8.67E-05             | 2.66E-09            |
| RGL3      | chr19:11495017:11530018:-1   | LUAD (32)              | 3                               | 3.09E-05             | 2.20E-07            |
| FUT1      | chr19:49251268:49258647:-1   | LUAD (32)              | 4                               | 2.03E-02             | 3.07E-03            |
| TD-314810 | chr19:49966009:49989488:1    | LUAD (32)              | 7                               | 1.11E-04             | 1.58E-08            |
| IL1RL1    | chr2:102927962:102968497:1   | LUAD (32)              | 3                               | 1.70E-04             | 8.76E-06            |
| IL18R1    | chr2:102927989:103015218:1   | LUAD (32)              | 3                               | 1.60E-04             | 8.23E-06            |
| ANKRD30BL | chr2:132905164:133015542:-1  | LUAD (32)              | 6                               | 2.44E-07             | 2.01E-11            |
| GATA5     | chr20:61038553:61051026:-1   | LUAD (32)              | 6                               | <b>5.51E-02</b>      | <b>1.01E-01</b>     |
| TNFRSF6B  | chr20:62328021:62330037:1    | LUAD (32)              | 7                               | 4.44E-13             | 4.22E-18            |
| B3GALT5   | chr21:40928369:41045064:1    | LUAD (32)              | 4                               | 9.95E-04             | 1.00E-03            |
| ALG12     | chr22:50293877:50312106:-1   | LUAD (32)              | 4                               | 3.36E-07             | 3.68E-09            |
| CRELD2    | chr22:50311815:50321188:1    | LUAD (32)              | 4                               | 3.99E-04             | 6.13E-05            |
| HYAL3     | chr3:50330262:50336899:-1    | LUAD (32)              | 3                               | 1.63E-03             | 1.00E-04            |
| NAT6      | chr3:50333833:50336852:-1    | LUAD (32)              | 3                               | 1.47E-03             | 9.11E-05            |
| ARF4      | chr3:57557090:57583947:-1    | LUAD (32)              | 3                               | 1.74E-02             | 3.03E-04            |
| LINC00955 | chr4:3578596:3592438:1       | LUAD (32)              | 9                               | 6.65E-05             | 9.06E-08            |
| TD-2228K2 | chr5:466239:473213:-1        | LUAD (32)              | 6                               | 2.89E-06             | 1.37E-09            |
| HLA-DRB5  | chr6:32485120:32498064:-1    | LUAD (32)              | 12                              | 1.34E-24             | 1.29E-35            |
| HLA-DPA1  | chr6:33032346:33048552:-1    | LUAD (32)              | 5                               | 1.19E-08             | 6.79E-11            |
| C6orf222  | chr6:36283534:36304662:-1    | LUAD (32)              | 3                               | 3.22E-03             | 2.54E-04            |
| SUMF2     | chr7:56131695:56148363:1     | LUAD (32)              | 4                               | 2.14E-05             | 6.24E-08            |
| ANGPT2    | chr8:6357172:6420930:-1      | LUAD (32)              | 4                               | 5.52E-03             | 3.40E-02            |
| TMEM55A   | chr8:92006024:92053292:-1    | LUAD (32)              | 3                               | 8.24E-04             | 5.76E-05            |
| C9orf170  | chr9:89763559:89774471:1     | LUAD (32)              | 3                               | 2.56E-04             | 1.61E-06            |
| RABL6     | chr9:139702374:139735639:1   | LUAD (32)              | 3                               | 2.60E-05             | 1.71E-06            |
| CCDC168   | chr13:103381801:103389159:-1 | COAD-US (19)           | 4                               | 1.34E-07             | 8.50E-11            |
| CCDC168   | chr13:103381801:103389159:-1 | UCEC-US (131)          | 4                               | 1.64E-08             | 6.33E-19            |

**Supplementary Table 3: Table showing FDR adjusted p-values for signatures of accelerated evolution when only highly conserved base positions were considered (GERP score <5, <3, and <1).** Our analysis shows that significant cases of SASE were not due to accumulation of excess of mutations at lowly conserved base positions, and those remain statistically significant even when only high conserved base positions were considered.

| Genes         | Position                     | Cohort (total samples) | # samples with significant SASE | FDR adjusted p-value |                |                |
|---------------|------------------------------|------------------------|---------------------------------|----------------------|----------------|----------------|
|               |                              |                        |                                 | GERP score < 5       | GERP score < 3 | GERP score < 1 |
| IGLL5         | chr22:23229960:23238287:+1   | MALY-DE (44)           | 8                               | 4.25E-11             | 4.12E-11       | 4.20E-12       |
| BTG2          | chr1:203274619:203278730:+1  | MALY-DE (44)           | 4                               | 8.75E-10             | 1.56E-09       | 7.15E-09       |
| BCL2          | chr18:60790579:60987361:-1   | MALY-DE (44)           | 5                               | 2.80E-04             | 3.95E-04       | 2.12E-04       |
| CD83          | chr6:14117872:14137149:+1    | MALY-DE (44)           | 3                               | 1.07E-03             | 4.78E-03       | 5.29E-03       |
| BCL6          | chr3:187439165:187463515:-1  | MALY-DE (44)           | 10                              | 7.40E-10             | 2.98E-09       | 6.20E-04       |
| TCL1A         | chr14:96176304:96180533:-1   | MALY-DE (44)           | 4                               | 7.88E-05             | 7.81E-05       | 6.26E-05       |
| DNMT1         | chr19:10244021:10341962:-1   | MALY-DE (44)           | 3                               | 1.06E-02             | 9.42E-03       | 8.39E-03       |
| MYC           | chr8:128747680:128753674:+1  | MALY-DE (44)           | 3                               | 1.37E-04             | 1.32E-04       | 1.12E-04       |
| S1PR2         | chr19:10334520:10341948:-1   | MALY-DE (44)           | 4                               | 1.60E-03             | 8.20E-04       | 1.12E-04       |
| BIRC3         | chr11:102188215:102210134:+1 | MALY-DE (44)           | 4                               | 5.30E-03             | 5.01E-03       | 3.62E-03       |
| RNF223        | chr1:1006346:1009687:-1      | Melanoma (25)          | 6                               | 4.98E-04             | 5.04E-04       | 5.16E-04       |
| MEAF6         | chr1:37958176:37980375:-1    | Melanoma (25)          | 3                               | 1.58E-04             | 1.72E-04       | 2.85E-04       |
| CCS           | chr11:66360292:66373490:+1   | Melanoma (25)          | 4                               | 8.45E-03             | 8.64E-03       | 1.18E-02       |
| RBM5          | chr3:50126341:50156454:+1    | Melanoma (25)          | 7                               | 3.11E-07             | 3.19E-07       | 6.27E-07       |
| KLHDC7A       | chr1:18807424-18812478:1     | LUAD (32)              | 3                               | 1.94E-03             | 1.95E-03       | 2.10E-03       |
| NOTCH2        | chr1:120454176-120612240:-1  | LUAD (32)              | 5                               | 1.53E-02             | 1.72E-02       | 3.73E-02       |
| ATP2B4        | chr1:203595689-203713209:1   | LUAD (32)              | 3                               | 6.32E-04             | 6.22E-04       | 2.47E-04       |
| FANK1         | chr10:127585108-127698161:1  | LUAD (32)              | 8                               | 1.60E-09             | 1.64E-09       | 1.70E-06       |
| PWWP2B        | chr10:134210672-134231367:1  | LUAD (32)              | 15                              | 2.20E-13             | 2.23E-13       | 7.17E-14       |
| MAP4K2        | chr11:64556290-64570713:-1   | LUAD (32)              | 3                               | 6.89E-03             | 6.64E-03       | 2.28E-03       |
| DEFB108B      | chr11:71544246-71548756:1    | LUAD (32)              | 4                               | 4.38E-03             | 4.34E-03       | 3.13E-03       |
| ZNF10         | chr12:133707161-133736051:1  | LUAD (32)              | 4                               | 9.74E-03             | 9.89E-03       | 1.00E-02       |
| SERPINA12     | chr14:94953611-94984181:-1   | LUAD (32)              | 5                               | 1.10E-04             | 1.10E-04       | 1.19E-04       |
| HBZ           | chr16:202686-204502:1        | LUAD (32)              | 5                               | 1.64E-04             | 1.63E-04       | 1.73E-04       |
| HBM           | chr16:203891-216767:1        | LUAD (32)              | 5                               | 1.10E-04             | 1.10E-04       | 1.17E-04       |
| TPSG1         | chr16:1271651-1275257:-1     | LUAD (32)              | 4                               | 3.37E-02             | 3.08E-02       | 2.22E-02       |
| ARHGAP17      | chr16:24930706-25026987:-1   | LUAD (32)              | 3                               | 6.32E-04             | 6.22E-04       | 5.99E-04       |
| COX6A2        | chr16:31439052-31439967:-1   | LUAD (32)              | 5                               | 1.69E-11             | 1.60E-11       | 6.17E-12       |
| WWOX          | chr16:78133310-79246564:1    | LUAD (32)              | 4                               | 7.28E-04             | 7.30E-04       | 7.22E-04       |
| ZNF469        | chr16:88493879-88507165:1    | LUAD (32)              | 7                               | 2.21E-05             | 2.27E-05       | 2.14E-05       |
| SLFN12        | chr17:33738079-33760302:-1   | LUAD (32)              | 4                               | 1.27E-04             | 1.26E-04       | 1.23E-04       |
| KRTAP9-8      | chr17:39394297-39395256:1    | LUAD (32)              | 3                               | 2.56E-06             | 2.54E-06       | 2.21E-06       |
| SSTR2         | chr17:71161151-71167185:1    | LUAD (32)              | 9                               | 1.22E-05             | 9.77E-06       | 4.61E-06       |
| MUM1          | chr19:1285890-1378430:1      | LUAD (32)              | 3                               | 4.13E-03             | 4.16E-03       | 3.65E-03       |
| EFNA2         | chr19:1286153-1301430:1      | LUAD (32)              | 3                               | 3.14E-03             | 3.20E-03       | 2.77E-03       |
| OR7G3         | chr19:9236688-9237626:-1     | LUAD (32)              | 3                               | 5.79E-04             | 5.73E-04       | 4.36E-04       |
| RGL3          | chr19:11495017-11530018:-1   | LUAD (32)              | 3                               | 7.54E-04             | 7.38E-04       | 2.55E-03       |
| FUT1          | chr19:49251268-49258647:-1   | LUAD (32)              | 4                               | 3.19E-02             | 3.17E-02       | 2.36E-02       |
| CTD-3148110.5 | chr19:49966009-49989488:1    | LUAD (32)              | 7                               | 2.94E-03             | 3.20E-03       | 2.86E-03       |
| IL1RL1        | chr2:102927962-102968497:1   | LUAD (32)              | 3                               | 8.07E-04             | 7.89E-04       | 7.22E-04       |
| IL18R1        | chr2:102927989-103015218:1   | LUAD (32)              | 3                               | 7.54E-04             | 7.38E-04       | 7.03E-04       |
| ANKRD30BL     | chr2:132905164-133015542:-1  | LUAD (32)              | 6                               | 7.64E-05             | 7.56E-05       | 7.15E-05       |
| GATA5         | chr20:61038553-61051026:-1   | LUAD (32)              | 3                               | 6.20E-04             | 6.04E-04       | 5.12E-04       |
| TNFRSF6B      | chr20:62328021-62330037:1    | LUAD (32)              | 7                               | 4.94E-09             | 3.98E-09       | 3.58E-09       |
| B3GALT5       | chr21:40928369-41045064:1    | LUAD (32)              | 4                               | 2.08E-02             | 2.13E-02       | 1.75E-02       |
| ALG12         | chr22:50293877-50312106:-1   | LUAD (32)              | 4                               | 3.13E-05             | 2.91E-05       | 2.87E-05       |
| CRELD2        | chr22:50311815-50321188:1    | LUAD (32)              | 4                               | 3.79E-02             | 3.79E-02       | 3.73E-02       |
| HYAL3         | chr3:50330262-50336899:-1    | LUAD (32)              | 3                               | 1.31E-02             | 1.25E-02       | 9.66E-02       |
| NAT6          | chr3:50333833-50336852:-1    | LUAD (32)              | 3                               | 1.25E-02             | 1.17E-02       | 9.19E-03       |
| ARF4          | chr3:57557090-57583947:-1    | LUAD (32)              | 3                               | 3.71E-02             | 3.65E-02       | 3.30E-02       |
| LINC00955     | chr4:3578596-3592438:1       | LUAD (32)              | 9                               | 5.64E-13             | 5.59E-13       | 2.94E-13       |
| CTD-2228K2.5  | chr5:466239-473213:-1        | LUAD (32)              | 6                               | 9.74E-03             | 9.55E-03       | 9.32E-03       |
| HLA-DRB5      | chr6:32485120-32498064:-1    | LUAD (32)              | 12                              | 3.37E-12             | 3.10E-12       | 6.10E-12       |
| HLA-DPA1      | chr6:33032346-33048552:-1    | LUAD (32)              | 5                               | 5.33E-05             | 5.29E-05       | 4.35E-05       |
| C6orf222      | chr6:36283534-36304662:-1    | LUAD (32)              | 3                               | 3.37E-02             | 3.43E-02       | 3.30E-02       |
| SUMF2         | chr7:56131695-56148363:1     | LUAD (32)              | 4                               | 2.79E-03             | 2.77E-03       | 2.28E-03       |
| ANGPT2        | chr8:6357172-6420930:-1      | LUAD (32)              | 4                               | 3.37E-02             | 3.34E-02       | 3.47E-02       |
| TMEM55A       | chr8:92006024-92053292:-1    | LUAD (32)              | 3                               | 1.54E-02             | 1.50E-02       | 1.03E-02       |
| C9orf170      | chr9:89763559-89774471:1     | LUAD (32)              | 3                               | 3.72E-03             | 3.51E-03       | 2.55E-03       |
| RABL6         | chr9:139702374-139735639:1   | LUAD (32)              | 3                               | 6.32E-04             | 6.22E-04       | 5.27E-04       |
| CCDC168       | chr13:103381801:103389159:-1 | COAD-US (19)           | 4                               | 2.11E-05             | 2.14E-05       | 1.56E-05       |
| CCDC168       | chr13:103381801:103389159:-1 | UCEC-US (131)          | 4                               | 1.24E-08             | 8.47E-09       | 9.34E-08       |

**Supplementary Table 4: Table showing FDR adjusted p-values for signatures of accelerated evolution when all the samples in a cohort were pooled.** This analysis includes all the samples including those that were deemed 'significant' and also those deemed 'not significant' in the cohort in the original analysis.

| Genes         | Position                     | Cohort (total samples) | FDR pvalue |
|---------------|------------------------------|------------------------|------------|
| BCL6          | chr3:187439165:187463515:-1  | MALY-DE (44)           | 1.41E-15   |
| IGLL5         | chr22:23229960:23238287:+1   | MALY-DE (44)           | 1.30E-13   |
| BTG2          | chr1:203274619:203278730:+1  | MALY-DE (44)           | 5.97E-13   |
| TCL1A         | chr14:96176304:96180533:-1   | MALY-DE (44)           | 1.09E-09   |
| BCL2          | chr18:60790579:60987361:-1   | MALY-DE (44)           | 4.78E-07   |
| BIRC3         | chr11:102188215:102210134:+1 | MALY-DE (44)           | 1.60E-06   |
| MYC           | chr8:128747680:128753674:+1  | MALY-DE (44)           | 2.03E-06   |
| S1PR2         | chr19:10334520:10341948:-1   | MALY-DE (44)           | 3.26E-06   |
| CD83          | chr6:14117872:14137149:+1    | MALY-DE (44)           | 4.04E-05   |
| DNMT1         | chr19:10244021:10341962:-1   | MALY-DE (44)           | 5.88E-03   |
| RBM5          | chr3:50126341:50156454:+1    | Melanoma (25)          | 9.88E-18   |
| RNF223        | chr1:1006346:1009687:-1      | Melanoma (25)          | 1.71E-07   |
| CCS           | chr11:66360292:66373490:+1   | Melanoma (25)          | 1.45E-06   |
| MEAF6         | chr1:37958176:37980375:-1    | Melanoma (25)          | 7.31E-04   |
| KLHDC7A       | chr1:18807424:18812478:1     | LUAD (32)              | 4.63E-05   |
| NOTCH2        | chr1:120454176:120612240:-1  | LUAD (32)              | 3.10E-11   |
| ATP2B4        | chr1:203595689:203713209:1   | LUAD (32)              | 1.08E-06   |
| FANK1         | chr10:127585108:127698161:1  | LUAD (32)              | 3.34E-21   |
| PWWP2B        | chr10:134210672:134231367:1  | LUAD (32)              | 5.45E-28   |
| MAP4K2        | chr11:64556290:64570713:-1   | LUAD (32)              | 7.05E-04   |
| DEFB108B      | chr11:71544246:71548756:1    | LUAD (32)              | 2.46E-07   |
| ZNF10         | chr12:133707161:133736051:1  | LUAD (32)              | 3.59E-07   |
| SERPINA12     | chr14:94953611:94984181:-1   | LUAD (32)              | 5.09E-14   |
| HBZ           | chr16:202686:204502:1        | LUAD (32)              | 6.27E-09   |
| HBM           | chr16:203891:216767:1        | LUAD (32)              | 1.05E-08   |
| TPSG1         | chr16:1271651:1275257:-1     | LUAD (32)              | 2.37E-06   |
| ARHGAP17      | chr16:24930706:25026987:-1   | LUAD (32)              | 1.41E-10   |
| COX6A2        | chr16:31439052:31439967:-1   | LUAD (32)              | 1.36E-15   |
| WWOX          | chr16:78133310:79246564:1    | LUAD (32)              | 6.29E-07   |
| ZNF469        | chr16:88493879:88507165:1    | LUAD (32)              | 2.81E-15   |
| SLFN12        | chr17:33738079:33760302:-1   | LUAD (32)              | 6.28E-11   |
| KRTAP9-8      | chr17:39394297:39395256:1    | LUAD (32)              | 1.25E-10   |
| SSTR2         | chr17:71161151:71167185:1    | LUAD (32)              | 2.97E-13   |
| MUM1          | chr19:1285890:1378430:1      | LUAD (32)              | 1.91E-08   |
| EFNA2         | chr19:1286153:1301430:1      | LUAD (32)              | 1.00E-08   |
| OR7G3         | chr19:9236688:9237626:-1     | LUAD (32)              | 7.88E-06   |
| RGL3          | chr19:11495017:11530018:-1   | LUAD (32)              | 5.78E-10   |
| FUT1          | chr19:49251268:49258647:-1   | LUAD (32)              | 3.35E-04   |
| CTD-3148I10.9 | chr19:49966009:49989488:1    | LUAD (32)              | 1.15E-10   |
| IL1RL1        | chr2:102927962:102968497:1   | LUAD (32)              | 1.30E-07   |
| IL18R1        | chr2:102927989:103015218:1   | LUAD (32)              | 1.19E-07   |
| ANKRD30BL     | chr2:132905164:133015542:-1  | LUAD (32)              | 3.37E-12   |
| GATA5         | chr20:61038553:61051026:-1   | LUAD (32)              | 6.91E-05   |
| TNFRSF6B      | chr20:62328021:62330037:1    | LUAD (32)              | 3.78E-14   |
| B3GALT5       | chr21:40928369:41045064:1    | LUAD (32)              | 1.22E-06   |
| ALG12         | chr22:50293877:50312106:-1   | LUAD (32)              | 1.30E-13   |
| CRELD2        | chr22:50311815:50321188:1    | LUAD (32)              | 8.08E-07   |
| HYAL3         | chr3:50330262:50336899:-1    | LUAD (32)              | 1.00E-11   |
| NAT6          | chr3:50333833:50336852:-1    | LUAD (32)              | 8.56E-12   |
| ARF4          | chr3:57557090:57583947:-1    | LUAD (32)              | 3.34E-04   |
| LINC00955     | chr4:3578596:3592438:1       | LUAD (32)              | 1.18E-18   |
| CTD-2228K2.5  | chr5:466239:473213:-1        | LUAD (32)              | 3.20E-08   |
| HLA-DRB5      | chr6:32485120:32498064:-1    | LUAD (32)              | 2.81E-15   |
| HLA-DPA1      | chr6:33032346:33048552:-1    | LUAD (32)              | 1.25E-07   |
| C6orf222      | chr6:36283534:36304662:-1    | LUAD (32)              | 8.51E-06   |
| SUMF2         | chr7:56131695:56148363:1     | LUAD (32)              | 5.45E-06   |
| ANGPT2        | chr8:6357172:6420930:-1      | LUAD (32)              | 7.75E-05   |
| TMEM55A       | chr8:92006024:92053292:-1    | LUAD (32)              | 6.19E-09   |
| C9orf170      | chr9:89763559:89774471:1     | LUAD (32)              | 1.77E-05   |
| RABL6         | chr9:139702374:139735639:1   | LUAD (32)              | 8.34E-11   |
| CCDC168       | chr13:103381801:103389159:-1 | COAD-US (19)           | 8.90E-07   |
| CCDC168       | chr13:103381801:103389159:-1 | UCEC-US (131)          | 2.20E-13   |



**Supplementary Table 5: Table showing FDR adjusted p-values for signatures of accelerated evolution when all the alternative transcripts were included. When a gene has multiple transcripts with significant SASE in the promoters, only the most significant one is shown below.**

| Genes    | Position                     | Cohort (total samples) | # samples with significant SASE | FDR p-value |
|----------|------------------------------|------------------------|---------------------------------|-------------|
| IGLL5    | chr22:23229960-23238287:1    | MALY-DE (44)           | 10                              | 9.88E-17    |
| RHOH     | chr4:40192673-40248587:1     | MALY-DE (44)           | 6                               | 5.71E-14    |
| BCL2     | chr18:60790579-60987361:-1   | MALY-DE (44)           | 11                              | 1.05E-13    |
| BCL6     | chr3:187439165-187463515:-1  | MALY-DE (44)           | 10                              | 2.14E-11    |
| BTG2     | chr1:203274619-203278730:1   | MALY-DE (44)           | 4                               | 1.62E-09    |
| BCL2L11  | chr2:111876955-111926024:1   | MALY-DE (44)           | 4                               | 5.33E-08    |
| TCL1A    | chr14:96176304-96180533:-1   | MALY-DE (44)           | 5                               | 1.25E-06    |
| MYC      | chr8:128747680-128753674:1   | MALY-DE (44)           | 3                               | 1.26E-04    |
| CD83     | chr6:14117872-14137149:1     | MALY-DE (44)           | 3                               | 1.14E-03    |
| DNMT1    | chr19:10244021-10341962:-1   | MALY-DE (44)           | 4                               | 1.82E-03    |
| S1PR2    | chr19:10334520-10341948      | MALY-DE (44)           | 4                               | 1.82E-03    |
| CIITA    | chr16:10971055-11026079:1    | MALY-DE (44)           | 3                               | 2.34E-03    |
| BIRC3    | chr11:102188215-102210134:1  | MALY-DE (44)           | 4                               | 6.24E-03    |
| CCDC168  | chr13:103381801-103389159:-1 | COAD-US (19)           | 4                               | 8.81E-04    |
| CCDC168  | chr13:103381801-103389159:-1 | UCEC-US (131)          | 4                               | 1.23E-07    |
| F7       | chr13:113760105-113774995:1  | Melanoma (25)          | 8                               | 8.70E-10    |
| FAM210A  | chr18:13663346-13726662:-1   | Melanoma (25)          | 14                              | 3.47E-09    |
| PXMP2    | chr12:133264192-133297276:1  | Melanoma (25)          | 4                               | 1.74E-07    |
| RBM5     | chr3:50126341-50156454:1     | Melanoma (25)          | 7                               | 1.74E-07    |
| ERICH1   | chr8:564746-688106:-1        | Melanoma (25)          | 8                               | 1.37E-05    |
| CCDC146  | chr7:76751751-76958850:1     | Melanoma (25)          | 5                               | 2.71E-05    |
| MEAF6    | chr1:37958176-37980375:-1    | Melanoma (25)          | 3                               | 1.57E-04    |
| FRG1     | chr4:190861943-190884359:1   | Melanoma (25)          | 8                               | 2.44E-04    |
| RNF223   | chr1:1006346-1009687:-1      | Melanoma (25)          | 6                               | 5.77E-04    |
| ABR      | chr17:906758-1132315:-1      | Melanoma (25)          | 3                               | 1.76E-03    |
| GPR176   | chr15:40091233-40213093:-1   | Melanoma (25)          | 6                               | 3.96E-03    |
| SCFD1    | chr14:31091318-31205018:1    | Melanoma (25)          | 5                               | 9.19E-03    |
| CCS      | chr11:66360292-66373490:1    | Melanoma (25)          | 4                               | 1.14E-02    |
| SMAP1    | chr6:71377479-71571718:1     | Melanoma (25)          | 4                               | 1.31E-02    |
| POM121C  | chr7:75046066-75115548:-1    | Melanoma (25)          | 4                               | 1.44E-02    |
| PLEKHG4B | chr5:140373-190085:1         | Melanoma (25)          | 8                               | 1.73E-02    |
| CCDC65   | chr12:49297893-49325623:1    | Melanoma (25)          | 3                               | 3.78E-02    |
| NCAPD3   | chr11:134020014-134095348:-1 | Melanoma (25)          | 5                               | 3.85E-02    |
| OSBPL8   | chr12:76745577-76953589:-1   | Melanoma (25)          | 5                               | 4.02E-02    |
| RNASE10  | chr14:20973696-20979328:1    | Melanoma (25)          | 4                               | 4.95E-02    |
| MTA1     | chr14:105886159-105937066:1  | Melanoma (25)          | 3                               | 4.95E-02    |
| AGRN     | chr1:955503-991496:1         | LUAD (32)              | 3                               | 1.58E-02    |
| PRAMEF1  | chr1:12851546-12856777:1     | LUAD (32)              | 12                              | 2.71E-15    |
| NBPF1    | chr1:16888814-16940057:-1    | LUAD (32)              | 8                               | 1.44E-02    |
| KLHDC7A  | chr1:18807424-18812478:1     | LUAD (32)              | 3                               | 1.90E-03    |
| INPP5B   | chr1:38326369-38412729:-1    | LUAD (32)              | 3                               | 1.14E-02    |
| PLK3     | chr1:45265897-45271662:1     | LUAD (32)              | 3                               | 8.74E-03    |
| GBP1     | chr1:89518002-89531043:-1    | LUAD (32)              | 3                               | 3.05E-03    |
| NOTCH2   | chr1:120454176-120612240:-1  | LUAD (32)              | 5                               | 1.37E-02    |
| PDE4DIP  | chr1:144836157-145076186:-1  | LUAD (32)              | 5                               | 4.35E-03    |
| FCGR2A   | chr1:161475220-161493803:1   | LUAD (32)              | 6                               | 1.88E-03    |
| ATP2B4   | chr1:203595689-203713209:1   | LUAD (32)              | 3                               | 7.41E-04    |
| BTRC     | chr10:103113820-103317078:1  | LUAD (32)              | 3                               | 1.25E-02    |
| TRIM8    | chr10:104404253-104418164:1  | LUAD (32)              | 3                               | 9.40E-04    |

|           |                              |           |    |          |
|-----------|------------------------------|-----------|----|----------|
| DHX32     | chr10:127524906-127585005:-1 | LUAD (32) | 8  | 6.60E-09 |
| FANK1     | chr10:127585108-127698161:1  | LUAD (32) | 8  | 2.09E-09 |
| PWWP2B    | chr10:134210672-134231367:1  | LUAD (32) | 15 | 1.54E-13 |
| TUBGCP2   | chr10:135093135-135125841:-1 | LUAD (32) | 8  | 5.30E-10 |
| BRSK2     | chr11:1411129-1483919:1      | LUAD (32) | 5  | 2.12E-02 |
| TCP11L1   | chr11:33060963-33127489:1    | LUAD (32) | 4  | 2.32E-02 |
| ACCS      | chr11:44087475-44105772:1    | LUAD (32) | 7  | 5.86E-07 |
| NXF1      | chr11:62559595-62573774:-1   | LUAD (32) | 3  | 2.78E-02 |
| MAP4K2    | chr11:64556290-64570713:-1   | LUAD (32) | 3  | 8.75E-04 |
| CDC42BPG  | chr11:64590859-64612041:-1   | LUAD (32) | 3  | 4.85E-02 |
| DEFB108B  | chr11:71544246-71548756:1    | LUAD (32) | 4  | 6.18E-05 |
| GDPD5     | chr11:75145685-75236948:-1   | LUAD (32) | 4  | 4.48E-05 |
| CWF19L2   | chr11:107197071-107328572:-1 | LUAD (32) | 5  | 2.53E-08 |
| NXPE1     | chr11:114392437-114430617:-1 | LUAD (32) | 7  | 5.72E-11 |
| ITFG2     | chr12:2921788-2968957:1      | LUAD (32) | 4  | 2.41E-02 |
| A2ML1     | chr12:8975068-9039597:1      | LUAD (32) | 5  | 5.77E-04 |
| PRR4      | chr12:10977559-11324212:-1   | LUAD (32) | 6  | 3.41E-07 |
| DDX11     | chr12:31226779-31257725:1    | LUAD (32) | 6  | 4.36E-04 |
| TMBIM6    | chr12:50101508-50158717:1    | LUAD (32) | 3  | 3.26E-02 |
| SLC11A2   | chr12:51373184-51422349:-1   | LUAD (32) | 3  | 2.40E-04 |
| TBK1      | chr12:64845660-64895888:1    | LUAD (32) | 3  | 1.53E-02 |
| HSP90B1   | chr12:104323885-104347423:1  | LUAD (32) | 3  | 2.24E-02 |
| TDG       | chr12:104359582-104382652:1  | LUAD (32) | 6  | 7.36E-09 |
| ULK1      | chr12:132379196-132407712:1  | LUAD (32) | 8  | 1.32E-12 |
| ZNF891    | chr12:133694740-133707059:-1 | LUAD (32) | 4  | 2.06E-03 |
| ZNF10     | chr12:133707161-133736051:1  | LUAD (32) | 4  | 8.86E-03 |
| FARP1     | chr13:98794816-99102027:1    | LUAD (32) | 4  | 4.39E-02 |
| GAS6      | chr13:114523522-114567046:-1 | LUAD (32) | 4  | 1.63E-02 |
| GEMIN2    | chr14:39583427-39606177:1    | LUAD (32) | 5  | 1.44E-02 |
| PPP1R36   | chr14:65016620-65056098:1    | LUAD (32) | 4  | 3.05E-03 |
| PLEKHH1   | chr14:68000018-68056329:1    | LUAD (32) | 4  | 1.41E-02 |
| RGS6      | chr14:72399156-73030654:1    | LUAD (32) | 3  | 2.61E-02 |
| DPF3      | chr14:73086004-73360809:-1   | LUAD (32) | 3  | 5.00E-02 |
| CCDC88C   | chr14:91737667-91884188:-1   | LUAD (32) | 4  | 1.96E-03 |
| SERPINA12 | chr14:94953611-94984181:-1   | LUAD (32) | 5  | 1.21E-04 |
| EVL       | chr14:100437786-100610573:1  | LUAD (32) | 4  | 2.72E-06 |
| TNFAIP2   | chr14:103589779-103603776:1  | LUAD (32) | 3  | 2.64E-02 |
| MARK3     | chr14:103851729-103970168:1  | LUAD (32) | 3  | 3.76E-02 |
| JAG2      | chr14:105607318-105635161:-1 | LUAD (32) | 8  | 2.09E-06 |
| HERC2     | chr15:28356186-28567298:-1   | LUAD (32) | 11 | 7.97E-17 |
| PLCB2     | chr15:40570377-40600136:-1   | LUAD (32) | 6  | 1.99E-03 |
| HDC       | chr15:50534144-50558223:-1   | LUAD (32) | 4  | 5.69E-03 |
| GOLGA6A   | chr15:74362198-74374891:-1   | LUAD (32) | 5  | 7.89E-05 |
| CHRNB4    | chr15:78916461-79020096:-1   | LUAD (32) | 4  | 1.10E-02 |
| KIF7      | chr15:90152020-90198682:-1   | LUAD (32) | 4  | 1.67E-03 |
| VPS33B    | chr15:91541646-91565833:-1   | LUAD (32) | 3  | 4.85E-02 |
| HBZ       | chr16:202686-204502:1        | LUAD (32) | 5  | 1.89E-04 |
| HBM       | chr16:203891-216767:1        | LUAD (32) | 5  | 1.21E-04 |
| TMEM8A    | chr16:420773-437113:-1       | LUAD (32) | 3  | 1.18E-02 |
| DECR2     | chr16:451826-462487:1        | LUAD (32) | 3  | 2.12E-02 |
| CAPN15    | chr16:577717-604636:1        | LUAD (32) | 21 | 2.84E-58 |
| TPSG1     | chr16:1271651-1275257:-1     | LUAD (32) | 4  | 2.77E-02 |
| BAIAP3    | chr16:1383602-1399439:1      | LUAD (32) | 4  | 1.27E-02 |
| IL32      | chr16:3115298-3131908:1      | LUAD (32) | 4  | 3.09E-02 |
| NPIPA1    | chr16:15016659-15045915:1    | LUAD (32) | 6  | 8.08E-04 |
| RRN3      | chr16:15153879-15188174:-1   | LUAD (32) | 3  | 2.00E-06 |
| ARHGAP17  | chr16:24930706-25026987:-1   | LUAD (32) | 3  | 3.21E-04 |
| COX6A2    | chr16:31439052-31439967:-1   | LUAD (32) | 5  | 2.74E-11 |
| EDC4      | chr16:67906926-67918406:1    | LUAD (32) | 3  | 2.45E-03 |

|              |                             |           |    |          |
|--------------|-----------------------------|-----------|----|----------|
| CALB2        | chr16:71392616-71424341:1   | LUAD (32) | 24 | 2.43E-55 |
| WVVOX        | chr16:78133310-79246564:1   | LUAD (32) | 4  | 6.45E-04 |
| PLCG2        | chr16:81772702-81991899:1   | LUAD (32) | 3  | 1.59E-02 |
| ZNF469       | chr16:88493879-88507165:1   | LUAD (32) | 7  | 1.81E-05 |
| CTU2         | chr16:88772871-88781794:1   | LUAD (32) | 5  | 2.56E-02 |
| MYO1C        | chr17:1367392-1396106:-1    | LUAD (32) | 3  | 2.44E-03 |
| TP53         | chr17:7565097-7590856:-1    | LUAD (32) | 8  | 1.65E-12 |
| PER1         | chr17:8043790-8059824:-1    | LUAD (32) | 6  | 6.71E-08 |
| FBXW10       | chr17:18647326-18682662:1   | LUAD (32) | 5  | 3.90E-02 |
| LRRC37B      | chr17:30334891-30380523:1   | LUAD (32) | 3  | 6.02E-04 |
| SLFN12       | chr17:33738079-33760302:-1  | LUAD (32) | 4  | 1.45E-04 |
| KRTAP9-8     | chr17:39394297-39395256:1   | LUAD (32) | 3  | 2.00E-06 |
| BRCA1        | chr17:41196312-41277500:-1  | LUAD (32) | 4  | 2.99E-04 |
| SLC25A39     | chr17:42396993-42402238:-1  | LUAD (32) | 3  | 1.28E-03 |
| ITGA2B       | chr17:42449548-42466873:-1  | LUAD (32) | 3  | 7.96E-03 |
| ADAM11       | chr17:42836399-42859214:1   | LUAD (32) | 3  | 2.17E-04 |
| ITGB3        | chr17:45331212-45421658:1   | LUAD (32) | 4  | 2.45E-03 |
| ITGB3        | chr17:45331263-45421658:1   | LUAD (32) | 4  | 2.45E-03 |
| CACNA1G      | chr17:48638429-48704835:1   | LUAD (32) | 3  | 2.50E-02 |
| SSTR2        | chr17:71161151-71167185:1   | LUAD (32) | 9  | 9.34E-06 |
| 9-Sep        | chr17:75276651-75496678:1   | LUAD (32) | 4  | 3.20E-03 |
| TMC6         | chr17:76106539-76128488:-1  | LUAD (32) | 4  | 4.85E-02 |
| SLC38A10     | chr17:79218800-79269347:-1  | LUAD (32) | 3  | 8.90E-03 |
| FSCN2        | chr17:79495422-79504156:1   | LUAD (32) | 4  | 1.04E-02 |
| FN3KRP       | chr17:80674559-80688204:1   | LUAD (32) | 7  | 2.06E-07 |
| PQLC1        | chr18:77662420-77711664:-1  | LUAD (32) | 4  | 1.01E-04 |
| PALM         | chr19:708953-748329:1       | LUAD (32) | 4  | 4.31E-04 |
| MUM1         | chr19:1285890-1378430:1     | LUAD (32) | 3  | 4.05E-03 |
| EFNA2        | chr19:1286153-1301430:1     | LUAD (32) | 3  | 3.06E-03 |
| UBXN6        | chr19:4444996-4457819:-1    | LUAD (32) | 3  | 3.26E-05 |
| OR7G3        | chr19:9236688-9237626:-1    | LUAD (32) | 3  | 6.11E-04 |
| RGL3         | chr19:11495017-11530018:-1  | LUAD (32) | 3  | 8.77E-04 |
| DDX39A       | chr19:14519631-14530192:-1  | LUAD (32) | 3  | 8.74E-03 |
| SUPT5H       | chr19:39926796-39967310:1   | LUAD (32) | 3  | 2.66E-02 |
| GLTSCR1      | chr19:48111453-48206533:1   | LUAD (32) | 4  | 2.38E-02 |
| GRWD1        | chr19:48949030-48960279:1   | LUAD (32) | 4  | 4.36E-04 |
| FUT1         | chr19:49251268-49258647:-1  | LUAD (32) | 4  | 1.53E-02 |
| FGF21        | chr19:49258816-49261587:1   | LUAD (32) | 3  | 3.64E-02 |
| RUVBL2       | chr19:49496705-49519252:1   | LUAD (32) | 3  | 5.75E-03 |
| ALDH16A1     | chr19:49956426-49974305:1   | LUAD (32) | 8  | 6.21E-06 |
| CTD-314810.1 | chr19:49966009-49989488:1   | LUAD (32) | 7  | 2.91E-03 |
| SYT3         | chr19:51124564-51171651:-1  | LUAD (32) | 6  | 9.48E-04 |
| PXDN         | chr2:1635659-1748624:-1     | LUAD (32) | 3  | 3.06E-02 |
| CAD          | chr2:27440258-27466811:1    | LUAD (32) | 5  | 3.66E-02 |
| RASGRP3      | chr2:33661391-33789817:1    | LUAD (32) | 3  | 3.31E-02 |
| ANKRD36C     | chr2:96514587-96657541:-1   | LUAD (32) | 6  | 9.41E-05 |
| IL1RL1       | chr2:102927962-102968497:1  | LUAD (32) | 3  | 8.32E-04 |
| IL18R1       | chr2:102927989-103015218:1  | LUAD (32) | 3  | 8.77E-04 |
| ANKRD30BL    | chr2:132905164-133015542:-1 | LUAD (32) | 6  | 7.73E-05 |
| TANC1        | chr2:159825146-160089170:1  | LUAD (32) | 3  | 7.41E-04 |
| MFSO6        | chr2:191273081-191373931:1  | LUAD (32) | 4  | 2.94E-02 |
| C2orf80      | chr2:209030067-209054797:-1 | LUAD (32) | 3  | 3.67E-02 |
| KIF1A        | chr2:241653181-241759725:-1 | LUAD (32) | 3  | 3.24E-03 |
| TSHZ2        | chr20:51588946-52111869:1   | LUAD (32) | 3  | 4.31E-04 |
| GATA5        | chr20:61038553-61051026:-1  | LUAD (32) | 3  | 6.78E-04 |
| BIRC7        | chr20:61867235-61871859:1   | LUAD (32) | 5  | 9.40E-04 |
| TNFRSF6B     | chr20:62328021-62330037:1   | LUAD (32) | 7  | 5.22E-09 |
| ZNF512B      | chr20:62588055-62680113:-1  | LUAD (32) | 4  | 1.12E-03 |
| B3GALT5      | chr21:40928369-41045064:1   | LUAD (32) | 4  | 1.81E-02 |

|              |                             |           |    |          |
|--------------|-----------------------------|-----------|----|----------|
| PRDM15       | chr21:43218385-43299591:-1  | LUAD (32) | 6  | 1.85E-04 |
| CARD10       | chr22:37886400-37915549:-1  | LUAD (32) | 5  | 1.88E-03 |
| CELSR1       | chr22:46756731-46933067:-1  | LUAD (32) | 4  | 2.79E-02 |
| ALG12        | chr22:50293877-50312106:-1  | LUAD (32) | 4  | 2.81E-05 |
| CRELD2       | chr22:50311815-50321188:1   | LUAD (32) | 4  | 1.49E-06 |
| NCAPH2       | chr22:50946645-50961901:1   | LUAD (32) | 3  | 7.41E-04 |
| FANCD2       | chr3:10068098-10143614:1    | LUAD (32) | 5  | 1.08E-03 |
| HYAL3        | chr3:50330262-50336899:-1   | LUAD (32) | 3  | 7.50E-03 |
| NAT6         | chr3:50333833-50336852:-1   | LUAD (32) | 3  | 8.94E-03 |
| CACNA1D      | chr3:53528683-53847760:1    | LUAD (32) | 3  | 3.25E-02 |
| ARF4         | chr3:57557090-57583947:-1   | LUAD (32) | 3  | 2.99E-02 |
| SIDT1        | chr3:113251143-113348425:1  | LUAD (32) | 3  | 1.04E-02 |
| LINC00955    | chr4:3578596-3592438:1      | LUAD (32) | 9  | 3.62E-13 |
| WFS1         | chr4:6271576-6304992:1      | LUAD (32) | 3  | 8.08E-05 |
| RAPGEF2      | chr4:160025330-160281321:1  | LUAD (32) | 6  | 1.97E-10 |
| CTD-2228K2.5 | chr5:466239-473213:-1       | LUAD (32) | 6  | 5.78E-03 |
| ADAMTS16     | chr5:5140443-5320417:1      | LUAD (32) | 5  | 6.55E-03 |
| BRD8         | chr5:137475455-137514675:-1 | LUAD (32) | 4  | 2.57E-08 |
| UIMC1        | chr5:176332006-176449634:-1 | LUAD (32) | 3  | 1.15E-04 |
| RASGEF1C     | chr5:179527795-179636153:-1 | LUAD (32) | 5  | 4.39E-02 |
| FLT4         | chr5:180028506-180076624:-1 | LUAD (32) | 4  | 4.73E-02 |
| HLA-C        | chr6:31236526-31239907:-1   | LUAD (32) | 11 | 5.37E-21 |
| HLA-B        | chr6:31321649-31324965:-1   | LUAD (32) | 4  | 2.00E-06 |
| HLA-DRB5     | chr6:32485120-32498064:-1   | LUAD (32) | 12 | 4.55E-12 |
| HLA-DQB1     | chr6:32627244-32636160:-1   | LUAD (32) | 9  | 4.22E-13 |
| HLA-DPA1     | chr6:33032346-33048552:-1   | LUAD (32) | 5  | 5.11E-05 |
| C6orf222     | chr6:36283534-36304662:-1   | LUAD (32) | 3  | 2.77E-02 |
| PRIM2        | chr6:57179603-57513375:1    | LUAD (32) | 6  | 6.55E-03 |
| MTHFD1L      | chr6:151186685-151423023:1  | LUAD (32) | 4  | 8.29E-09 |
| FRMD1        | chr6:168456425-168482237:-1 | LUAD (32) | 4  | 2.07E-02 |
| INTS1        | chr7:1509913-1545489:-1     | LUAD (32) | 9  | 1.17E-05 |
| TMEM106B     | chr7:12250867-12282993:1    | LUAD (32) | 4  | 3.33E-02 |
| CAMK2B       | chr7:44256749-44374176:-1   | LUAD (32) | 6  | 2.69E-10 |
| SUMF2        | chr7:56131695-56148363:1    | LUAD (32) | 3  | 1.75E-03 |
| ZP3          | chr7:76026835-76071388:1    | LUAD (32) | 7  | 4.42E-04 |
| IMPDH1       | chr7:128032331-128050306:-1 | LUAD (32) | 3  | 3.33E-02 |
| KMT2C        | chr7:151832010-152133090:-1 | LUAD (32) | 7  | 4.88E-04 |
| ARHGEF10     | chr8:1772142-1906807:1      | LUAD (32) | 8  | 3.80E-09 |
| MYOM2        | chr8:1993155-2113475:1      | LUAD (32) | 8  | 1.63E-02 |
| CSMD1        | chr8:2792875-4852494:-1     | LUAD (32) | 3  | 4.88E-02 |
| ANGPT2       | chr8:6357172-6420930:-1     | LUAD (32) | 4  | 2.66E-02 |
| DPYSL2       | chr8:26371791-26515694:1    | LUAD (32) | 4  | 2.60E-02 |
| HGSNAT       | chr8:42995556-43057998:1    | LUAD (32) | 3  | 6.32E-03 |
| TMEM55A      | chr8:92006024-92053292:-1   | LUAD (32) | 3  | 1.44E-02 |
| DPY19L4      | chr8:95731931-95806064:1    | LUAD (32) | 3  | 6.21E-03 |
| SCRIB        | chr8:144873090-144897549:-1 | LUAD (32) | 4  | 4.26E-02 |
| AQP7         | chr9:33384765-33402643:-1   | LUAD (32) | 3  | 1.18E-02 |
| PRSS3        | chr9:33750515-33799230:1    | LUAD (32) | 16 | 2.54E-81 |
| CNTNAP3B     | chr9:43684902-43924049:1    | LUAD (32) | 6  | 2.39E-03 |
| C9orf170     | chr9:89763559-89774471:1    | LUAD (32) | 3  | 3.56E-03 |
| SH3GLB2      | chr9:131769315-131790582:-1 | LUAD (32) | 3  | 3.45E-04 |
| CCDC183      | chr9:139690802-139702193:1  | LUAD (32) | 3  | 1.67E-03 |
| RABL6        | chr9:139702374-139735639:1  | LUAD (32) | 3  | 6.02E-04 |
| ABCA2        | chr9:139901686-139923367:-1 | LUAD (32) | 3  | 1.81E-02 |
| ENTPD2       | chr9:139942550-139948497:-1 | LUAD (32) | 6  | 9.67E-05 |
| GTPBP6       | chrX:220025-230886:-1       | LUAD (32) | 3  | 7.53E-08 |
| NROB1        | chrX:30322323-30327715:-1   | LUAD (32) | 4  | 4.85E-02 |
| MAMLD1       | chrX:149529689-149682448:1  | LUAD (32) | 5  | 2.90E-04 |

**Supplementary Table 6: Table showing cancer genes with somatic mutations in promoters and no somatic mutations in corresponding flanking regions in the second lymphoma cohort (Morin et al. Blood. 2013). The genes that had somatic mutations in the promoter of the major transcript are shown with asterisk.**

| gene    | cohort      | n_samples<br>(40) | Major<br>transcript |
|---------|-------------|-------------------|---------------------|
| NCAPD3  | melanoma    | 7                 |                     |
| MTA1    | melanoma    | 6                 |                     |
| OSBPL8  | melanoma    | 5                 |                     |
| FAM210A | melanoma    | 3                 |                     |
| ABR     | melanoma    | 2                 |                     |
| ERICH1  | melanoma    | 2                 |                     |
| CCDC168 | AD-US, UCEC | 1                 | *                   |
| BCL2    | MALY-DE     | 1                 | *                   |
| CD83    | MALY-DE     | 1                 | *                   |
| DNMT1   | MALY-DE     | 1                 |                     |
| RHOH    | MALY-DE     | 1                 |                     |
| TCL1A   | MALY-DE     | 1                 | *                   |
| CCDC146 | melanoma    | 1                 |                     |
| CCS     | melanoma    | 1                 | *                   |
| SMAP1   | melanoma    | 1                 |                     |
